# Supplementary material
Source: publisher figshare collection journal article supplement (https://wellcome.figshare.com/ndownloader/files/21004218)
Supplement: Supplementary file 1 [file 21004218]

**Notes about the format and processing of the survey results:**

- The original survey consisted of a set of 74 questions divided in thematic blocks: 1) Employment information, 2) Working environment, 3) Careers, 4) Career Development, 5) Perceptions, 6) Experiences, 7) Visions, 8) Demographic Information.
- There are 3 types of questions in the survey, indicated inside brackets with the question number:
  - single: single-choice question
  - multi: multiple-choice question (chosen options are separated by ‘;’)
  - grid: grid question (each sub-question is independently represented in a separate column)
- All sensitive information or data that could make individuals identifiable have been removed from the publicly released version, including demographic features and open-text fields.
- For some questions, the original responses have been merged into broader categories. For example:
  - Q4: Research discipline or sectors have been combined into 4 broad categories:
    - Physical Sciences (Astronomy / Astrophysics / Cosmology / Planetary science; Chemistry; Computer science; Engineering / Technology; Earth and environmental science; Mathematics; Materials science; Physics)
    - Life Sciences (Biomedical; Medicine; Agriculture and food; Biology)
    - Humanities/Social Science (Social Science / Psychology; Humanities)
    - Other
  - Q55: Country has been converted into UK vs non-UK
- NULL answers indicate that those questions were skipped for those participants as they followed a different routing in the survey (see the accompanying flow-chart for details about the skip-logic of the survey).
